# Supplementary material
Source: PubMed Central journal article supplement (PMC4540909)
Supplement: JCM.00541-15_zjm999094438so1.pdf [file JCM.00541-15_zjm999094438so1.pdf]

Table S1. Genomes of the *Mycobacterium abscessus* species used in this study.

| Strain      | Accession No.     | No. Protein | Reference                                     | Subsp. by <i>rpoB</i> | Subsp. by <i>hsp65</i> |
|-------------|-------------------|-------------|-----------------------------------------------|-----------------------|------------------------|
| M18         | NZ_AJSC00000000.1 | 4,726       | Ngeow et al. J. Bacteriol. 2012;194:4125      | <i>M. massiliense</i> | <i>M. massiliense</i>  |
| M115        | NZ_AJLZ00000000.1 | 4,822       | Ngeow et al. J. Bacteriol. 2012;194:4786      | <i>M. massiliense</i> | <i>M. massiliense</i>  |
| M154        | NZ_AJMA00000000.1 | 4,601       | Choo et al. J. Bacteriol. 2012; 194:4778)     | <i>M. massiliense</i> | <i>M. massiliense</i>  |
| M172        | NZ_AJSE00000000.1 | 5,069       | Choo et al. J. Bacteriol. 2012; 194:5128      | <i>M. massiliense</i> | <i>M. massiliense</i>  |
| M159        | NZ_AJSD00000000.1 | 4,791       | Ngeow et al. Genome Announc. 2013;1:e00669-13 | <i>M. massiliense</i> | <i>M. massiliense</i>  |
| M93         | NZ_AJGF00000000.1 | 4,848       | Choo et al. J. Bacteriol. 2012; 194:3278      | <i>M. abscessus</i>   | <i>M. abscessus</i>    |
| M94         | NZ_AJGG00000000.1 | 5,020       | Choo et al. J. Bacteriol. 2012; 194:5724      | <i>M. abscessus</i>   | <i>M. abscessus</i>    |
| M152        | NZ_AKVT00000000.1 | 4,741       | Ngeow et al. J. Bacteriol. 2012;194:6662      | <i>M. abscessus</i>   | <i>M. abscessus</i>    |
| M156        | NZ_AKVU00000000.1 | 4,919       | Choo et al. Genome Announc. 2013;1: e00063-12 | <i>M. massiliense</i> | <i>M. massiliense</i>  |
| M139        | NZ_AKVR00000000.1 | 4,876       | Ngeow et al. J. Bacteriol. 2012;194:6002-6003 | <i>M. massiliense</i> | <i>M. massiliense</i>  |
| M24         | AJLY00000000.2    | 5,336       | Wong et al. J. Bacteriol. 2012;194:4457       | <i>M. bolletii</i>    | <i>M. bolletii</i>     |
| M148        | NZ_AKVV00000000.1 | 5,427       | -                                             | <i>M. massiliense</i> | <i>M. massiliense</i>  |
| 1S-152-0914 | NZ_AKUJ00000000.1 | 4,718       | -                                             | <i>M. massiliense</i> | <i>M. massiliense</i>  |
| 1S-153-0915 | NZ_AKUK00000000.1 | 4,725       | -                                             | <i>M. massiliense</i> | <i>M. massiliense</i>  |
| 1S-154-0310 | NZ_AKUL00000000.1 | 4,720       | -                                             | <i>M. massiliense</i> | <i>M. massiliense</i>  |
| 2B-0107     | NZ_AKUN00000000.1 | 4,615       | -                                             | <i>M. massiliense</i> | <i>M. massiliense</i>  |
| 2B-0307     | NZ_AKUU00000000.1 | 4,617       | -                                             | <i>M. massiliense</i> | <i>M. massiliense</i>  |
| 2B-0626     | NZ_AKUM00000000.1 | 4,609       | -                                             | <i>M. massiliense</i> | <i>M. massiliense</i>  |
| 2B-0912-R   | NZ_AKUV00000000.1 | 4,616       | -                                             | <i>M. massiliense</i> | <i>M. massiliense</i>  |
| 2B-0912-S   | NZ_AKUW00000000.1 | 4,615       | -                                             | <i>M. massiliense</i> | <i>M. massiliense</i>  |
| 2B-1231     | NZ_AKUO00000000.1 | 4,615       | -                                             | <i>M. massiliense</i> | <i>M. massiliense</i>  |
| 3A0119R     | NZ_AKUX00000000.1 | 5,182       | -                                             | <i>M. abscessus</i>   | <i>M. abscessus</i>    |
| 3A0122R     | NZ_AKUY00000000.1 | 5,126       | -                                             | <i>M. abscessus</i>   | <i>M. abscessus</i>    |
| 3A0122S     | NZ_AKUZ00000000.1 | 5,109       | -                                             | <i>M. abscessus</i>   | <i>M. abscessus</i>    |
| 3A0731      | NZ_AKVA00000000.1 | 5,268       | -                                             | <i>M. abscessus</i>   | <i>M. abscessus</i>    |
| 3A0810R     | NZ_AKUP00000000.1 | 5,192       | -                                             | <i>M. abscessus</i>   | <i>M. abscessus</i>    |

|                         |                   |       |    |                                               |                                             |
|-------------------------|-------------------|-------|----|-----------------------------------------------|---------------------------------------------|
| 3A0930R                 | NZ_AKVB00000000.1 | 5,173 | -  | <i>M. abscessus</i>                           | <i>M. abscessus</i>                         |
| 3A0930S                 | NZ_AKVC00000000.1 | 5,149 | -- | <i>M. abscessus</i>                           | <i>M. abscessus</i>                         |
| 4S0116R                 | NZ_AKVD00000000.1 | 4,661 | -  | <i>M. abscessus</i>                           | <i>M. abscessus</i>                         |
| 4S0116S                 | NZ_AKVE00000000.1 | 4,661 | -  | <i>M. abscessus</i>                           | <i>M. abscessus</i>                         |
| 4S0206                  | NZ_AKUT00000000.1 | 4,674 | -  | <i>M. abscessus</i>                           | <i>M. abscessus</i>                         |
| 4S0303                  | NZ_AKTU00000000.1 | 4,668 | -  | <i>M. abscessus</i>                           | <i>M. abscessus</i>                         |
| 4S0726RA                | NZ_AKTV00000000.1 | 4,662 | -  | <i>M. abscessus</i>                           | <i>M. abscessus</i>                         |
| 4S0726RB                | NZ_AKTW00000000.1 | 4,668 | -  | <i>M. abscessus</i>                           | <i>M. abscessus</i>                         |
| 5S-0421                 | NZ_AKTY00000000.1 | 5,064 | -  | <i>M. massiliense</i>                         | <i>M. massiliense</i>                       |
| 5S-0422                 | NZ_AKTZ00000000.1 | 5,153 | -  | <i>M. massiliense</i>                         | <i>M. massiliense</i>                       |
| 5S-0708                 | NZ_AKUA00000000.1 | 5,070 | -  | <i>M. massiliense</i>                         | <i>M. massiliense</i>                       |
| 5S-0817                 | NZ_AKUB00000000.1 | 5,071 | -  | <i>M. massiliense</i>                         | <i>M. massiliense</i>                       |
| 5S-0921                 | NZ_AKUQ00000000.1 | 5,078 | -  | <i>M. massiliense</i>                         | <i>M. massiliense</i>                       |
| 5S-1212                 | NZ_AKUC00000000.1 | 5,064 | -  | <i>M. massiliense</i>                         | <i>M. massiliense</i>                       |
| 5S-1215                 | NZ_AKUD00000000.1 | 5,028 | -  | <i>M. massiliense</i>                         | <i>M. massiliense</i>                       |
| 5S0304                  | NZ_AKTX00000000.1 | 5,071 | -  | <i>M. massiliense</i>                         | <i>M. massiliense</i>                       |
| 6G0125R                 | NZ_AKUE00000000.1 | 4,958 | -  | <i>M. abscessus</i>                           | <i>M. abscessus</i>                         |
| 6G0125S                 | NZ_AKUF00000000.1 | 5,190 | -  | <i>M. abscessus</i>                           | <i>M. abscessus</i>                         |
| 6G0212                  | NZ_AKUR00000000.1 | 4,971 | -  | <i>M. abscessus</i>                           | <i>M. abscessus</i>                         |
| 6G0728R                 | NZ_AKUS00000000.1 | 5,200 | -  | <i>M. abscessus</i>                           | <i>M. abscessus</i>                         |
| 6G0728S                 | NZ_AKUG00000000.1 | 5,196 | -  | <i>M. abscessus</i>                           | <i>M. abscessus</i>                         |
| 6G1108                  | NZ_AKUH00000000.1 | 5,202 | -  | <i>M. abscessus</i>                           | <i>M. abscessus</i>                         |
| BD <sup>T</sup>         | NZ_AHAS00000000.1 | 4,849 |    | Choi et al. J. Bacteriol. 2012; 194:2756-2757 | <i>M. bolletii</i> <i>M. bolletii</i>       |
| Asan 50594              | NC_021282.1       | 4,910 |    | Kim et al. Genome Annouc. 2013;1: e00429-13   | <i>M. massiliense</i> <i>M. massiliense</i> |
| CCUG 48898 <sup>T</sup> | NZ_AKVF00000000.1 | 4,961 |    | Tettelin et al. J. Bacteriol. 2012;194:5450   | <i>M. massiliense</i> <i>M. massiliense</i> |

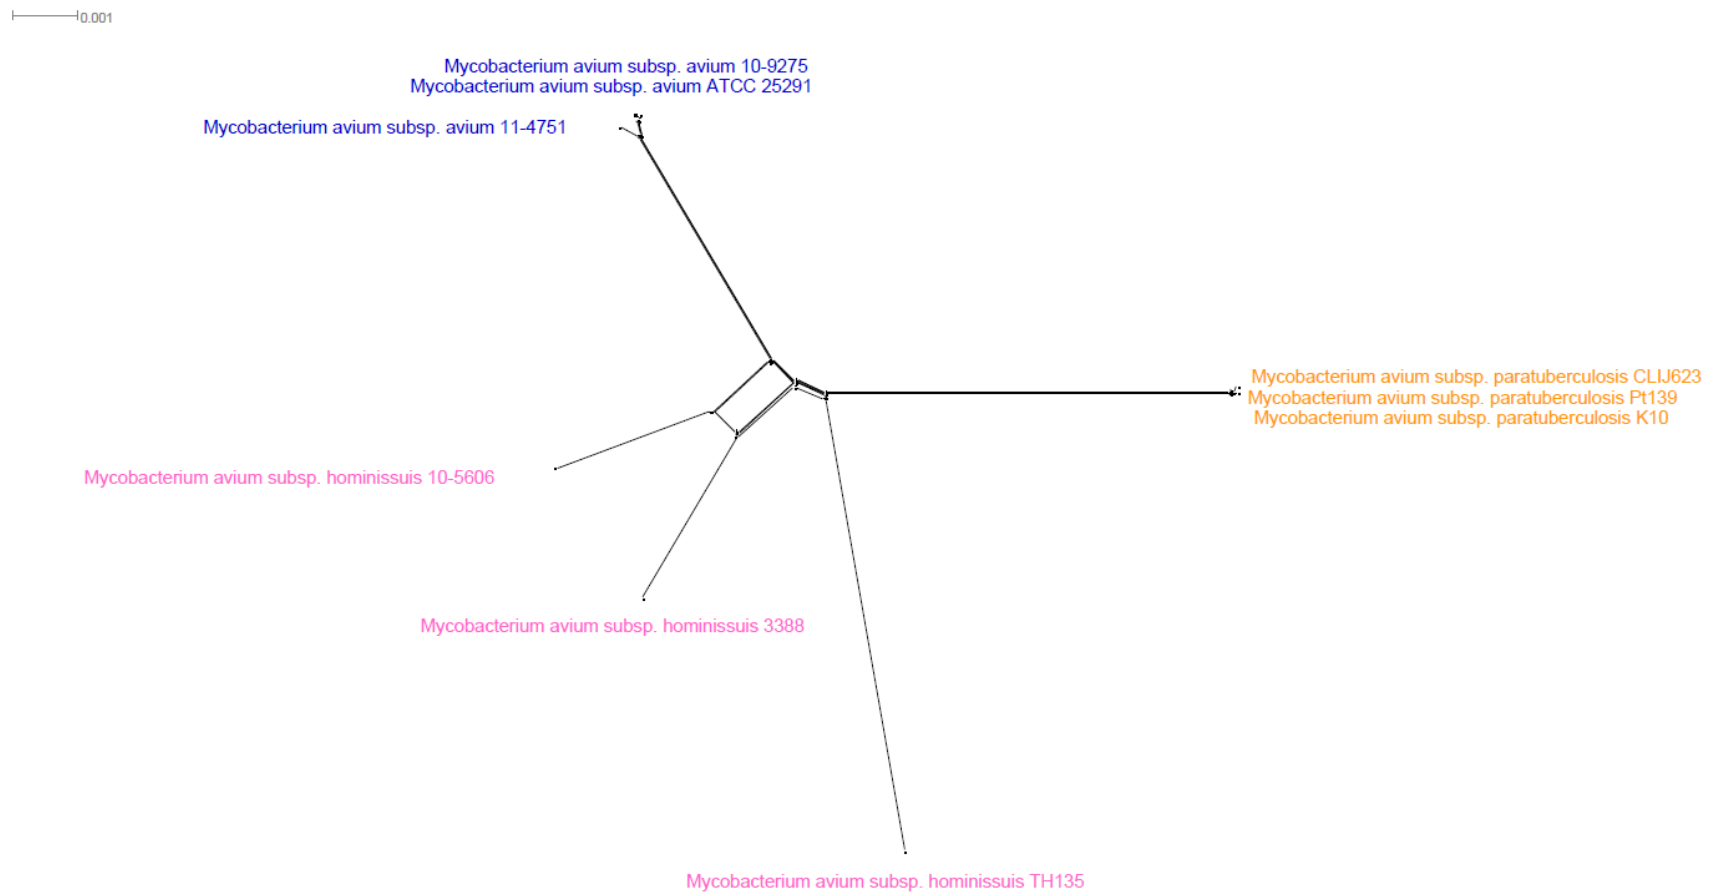

Figure S1. Neighbor-Net inferred tree for *M. avium* subsp. *paratuberculosis* (orange), *M. avium* subsp. *avium* (blue) and *M. avium* subsp. *hominissuis* (pink). The three established subspecies of *M. avium* complex are separated from each other in the phylogenomic tree based on single-copy orthologous sequences.

Table S2. Protein sequences and identified subspecies-specific amino acids

| Gene                                                                               | Position | <i>M. massiliense</i> | <i>M. abscessus</i> | <i>M. bolletii</i> |
|------------------------------------------------------------------------------------|----------|-----------------------|---------------------|--------------------|
| pseudouridine synthase                                                             | 28       | E                     | M                   | V                  |
| oxalate decarboxylase                                                              | 168      | L                     | P                   | T                  |
| putative regulatory protein TetR                                                   | 22       | D                     | Q                   | E                  |
| TetR family transcriptional regulator                                              | 104      | D                     | A                   | T                  |
| hypothetical protein                                                               | 68       | N                     | K                   | D                  |
| putative short chain dehydrogenase/reductase                                       | 42       | N                     | Q                   | K                  |
| hypothetical protein                                                               | 114      | A                     | M                   | V                  |
| hypothetical protein                                                               | 291      | A                     | V                   | I                  |
| hypothetical protein                                                               | 122      | V                     | I                   | M                  |
| magnesium-chelatase                                                                | 323      | D                     | E                   | G                  |
| hypothetical protein                                                               | 155      | V                     | L                   | A                  |
|                                                                                    | 188      | T                     | A                   | M                  |
| polyphosphate glucokinase PpgK                                                     | 17       | H                     | N                   | P                  |
| putative nucleotide-diphosphate-sugar epimerase                                    | 72       | G                     | R                   | E                  |
|                                                                                    | 225      | H                     | R                   | G                  |
| HAD-superfamily hydrolase YfnB                                                     | 169      | H                     | Y                   | R                  |
| bifunctional pyrimidine operon regulatory protein/Uracil phosphoribosyltransferase | 178      | C                     | R                   | S                  |
| cinA-like protein                                                                  | 248      | R                     | G                   | D                  |
| hypothetical protein                                                               | 18       | M                     | T                   | L                  |
| molybdenum ABC transporter permease                                                | 67       | M                     | L                   | V                  |
| iron import ATP-binding/permease protein IrtA                                      | 256      | P                     | A                   | S                  |
|                                                                                    | 268      | P                     | Q                   | R                  |
| hypothetical protein                                                               | 194      | K                     | T                   | M                  |
| hypothetical protein                                                               | 7        | T                     | A                   | V                  |
| hypothetical protein                                                               | 11       | V                     | I                   | A                  |
| hypothetical protein                                                               | 26       | V                     | I                   | T                  |
|                                                                                    | 27       | I                     | M                   | V                  |
| hypothetical protein                                                               | 187      | S                     | A                   | T                  |
| gamma-glutamyl phosphate reductase                                                 | 196      | I                     | V                   | A                  |
| putative monooxygenase                                                             | 60       | D                     | E                   | A                  |
| molybdopterin-guanine                                                              | 68       | Q                     | W                   | R                  |

|                                                                     |      |   |   |   |
|---------------------------------------------------------------------|------|---|---|---|
| dinucleotide biosynthesis protein A                                 |      |   |   |   |
| putative drug antiporter protein                                    | 412  | E | Q | R |
| hypothetical protein                                                | 182  | V | L | I |
| TetR family transcriptional regulator                               | 49   | N | S | K |
| mycocerosate synthase                                               | 1172 | V | T | A |
|                                                                     | 1220 | G | V | E |
| hypothetical protein                                                | 12   | A | V | M |
| hypothetical protein                                                | 37   | L | V | M |
| hypothetical protein                                                | 53   | T | V | A |
| dTDP-4-dehydrorhamnose reductase                                    | 40   | T | G | S |
| hypothetical protein                                                | 13   | R | P | A |
| mannose-6-phosphate isomerase ManA                                  | 66   | I | T | A |
|                                                                     | 217  | A | V | T |
| transcriptional regulator, TetR family                              | 181  | R | P | Q |
| hypothetical protein                                                | 197  | A | G | S |
| hypothetical protein                                                | 381  | S | K | R |
| 2-amino-4-hydroxy-6-hydroxymethyldihydropteridine pyrophosphokinase | 136  | L | V | A |
| peptidase C56 PfpI                                                  | 68   | R | T | A |
| dicarboxylic acid transport integral membrane protein KgtP          | 202  | M | T | V |
|                                                                     | 231  | T | A | V |
|                                                                     | 248  | W | R | G |
| hypothetical protein                                                | 15   | V | N | D |
| putative epimerase/dehydratase                                      | 105  | I | V | T |
|                                                                     | 129  | K | D | E |
| phosphomannomutase PmmB                                             | 99   | Q | L | K |
